# Supplementary figures and images for: Metabolomic Response to Non-Steroidal Anti-Inflammatory Drugs
Source: Research Square preprint supplement (doi:10.21203/rs.3.rs-5530702/v1), 2024-12-09

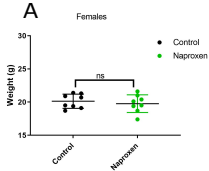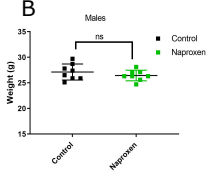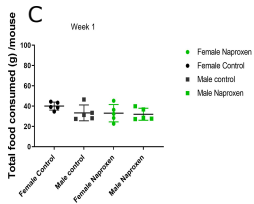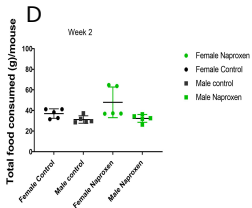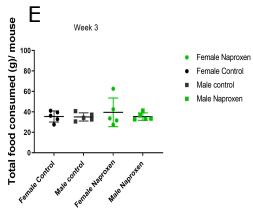

Supplement: Supplementary file 1 [file e029a22483ff1bf2caf0db03.pdf]
